## Correspondence

## The Tenofovir Pre-Exposure Prophylaxis Trial in Thailand: Researchers Should Show More Openness in Their Engagement with the Community

Arlene Chua, Nathan Ford, David Wilson, Paul Cawthorne

Two recent articles in *PLoS Medicine* [1,2] criticise the role played by activists in raising concerns about the tenofovir trial for HIV prophylaxis. We fully support the fact that activism should be based on informed opinion, rather than speculation, unwarranted criticism, overreaction, or sensationalising facts [1], and believe that in Thailand, the concerns raised by activists are entirely legitimate.

The key community groups that have expressed concerns about the tenofovir trial in Thailand are the Thai Drug Users Network (TDN) and the Thai AIDS Treatment Advocacy Group (TTAG), which are described in Box 1. These community groups, which can justifiably claim to represent Thai drug users, are well informed about the trial, but their objective concerns have been ignored by the trial investigators. Contrary to the assertion of Joep Lange [2] “that the investigators did consult intensely with community groups concerned”, TDN and TTAG were not consulted about the trial design and conduct until a very late stage, after several attempts to engage with the investigators had been rebuffed. TDN and TTAG had attempted to constructively engage with the investigators since October 2004; they confined their statements of concern to private letters and meetings with the investigators, until the matter was made public in a *Lancet* editorial in March 2005 [3].

One major concern about the trial was the failure to provide sterile needles and syringes. Singh and Mills assert that this is consistent with Thai government policy [1]. Long prison terms and death sentences are the norm for drug-related offences [4], and Thai police, who have wide discretionary powers, still occasionally use possession of needles as evidence to arrest suspected drug users. Thus, although needles and syringes are available over the counter from most retail pharmacies, intravenous drug users (IDUs) are afraid to purchase them and, indeed, are often afraid to use services known to be provided for drug users. There is, however, no law or policy forbidding the distribution of clean needles and syringes, and preventing the investigators from doing so.

In fact, the situation in Thailand is improving, with the National Harm Reduction Working Group, chaired by the Ministry of Public Health, taking steps to increase activities in this domain. In 2004, at the 15th International AIDS Conference in Thailand, the prime minister said, “We are now implementing a harm reduction program to reduce the risk of HIV infection among injecting drug users...the program...will be conducted through concerted collaboration among solo UN agencies, government bodies and non-governmental organizations including the Drug User Network” [5].

The reason clean injection materials are not distributed within the trial is because the United States government,

### Box 1. Community Groups Representing IDUs in Thailand

#### Thai Drug Users Network

TDN, Thailand’s only drug users’ group, was established in December 2002 in response to the health and human rights crisis facing drug users in Thailand, particularly injectors. TDN’s mission is to promote the basic human rights of people who use drugs, in order for them to be able to live with dignity in Thai society. TDN undertakes peer-driven HIV prevention, care, and support for IDUs, has supported the Thai government National Harm Reduction Working Group’s activities, and has provided technical input to United Nations Office on Drugs and Crime and World Health Organization consultations. Projects are jointly implemented with other organisations, such as the project Preventing HIV and Increasing Care and Support for IDUs in Thailand, which is funded by the Global Fund to Fight AIDS, Tuberculosis, and Malaria (GFATM).

#### Thai AIDS Treatment Action Group

TTAG was founded in December 2002 by the founding chairman of the Thai Network of People Living with HIV/AIDS (PLHA) in order to promote leadership and advocacy among PLHA. TTAG’s mission is to promote equal access to AIDS prevention and treatment for all individuals through policy advocacy and coalition building, and by strengthening the capacity of people living with HIV/AIDS to advocate for their human rights. Projects include Preventing HIV and Increasing Care and Support for IDUs in Thailand, which is funded by GFATM, and the Mekong Region Treatment Preparedness Initiative.

#### Key Objections of TDN and TTAG to the Tenofovir Pre-Exposure Prophylaxis Trial in Thailand in Its Present Form

- Absence of community consultation during the trial design and lack of meaningful consultation during its implementation.
- Best current prophylactic methods unavailable to trial participants.
- No commitment by trial sponsors to promote the safety of trial participants when accessing services.
- No commitment by the researchers to work, after the trial, with the Thai Ministry of Public Health towards price reductions of tenofovir.

#### Principle Recommendations

- Urgently establish a committee, chaired by the US Centers for Disease Control and Prevention, to address key HIV prevention, treatment, and care issues for Bangkok IDUs in the context of the trial. Members should include two TDN representatives, and Thai Red Cross, government, and nongovernmental representatives.
- Involve TDN in trial outreach and education, including curriculum development.
- Develop partnerships to ensure the safety of trial participants when accessing services; for example, the Bangkok Metropolitan Authority should host police training workshops on harm reduction, and TDN should be involved in these activities.
- Commit to supporting TDN in efforts to ensure at least two years of post-trial tenofovir to trial participants, and to working with the Thai Ministry of Public Health towards price reductions.

who sponsors the trial, bans federally funded organisations (including the Centers for Disease Control and Prevention, who are overseeing the trial) from supporting needle and syringe exchange.

Irrespective of whether a needle exchange exists in Thailand, or what the policies of the trial's funders are regarding needles and syringes, investigators have a duty to respect the Helsinki Declaration requirement that "benefits, risks, burdens and effectiveness of a new method should be tested against those of the best current prophylactic, diagnostic and therapeutic methods" [6].

The HIV/AIDS community in Thailand is not naive about the ethics of clinical trials: many have been directly or indirectly affected by previous AIDS drug trials in Thailand that have raised ethical concerns [7,8]. Nevertheless, TDN and TTAG have, from the beginning, made it clear that they support the development of innovative prevention tools to reduce the burden of global HIV, and would like this trial to go ahead.

We believe that the disagreements surrounding the tenofovir trial in Thailand would have been avoided if the investigators had set out to engage the community more openly, and if the wealth of established knowledge among community members could have contributed enormously to the success of the trial design and implementation. TDN and TTAG have made recommendations (see Box 1) that represent a constructive way for this trial to move forward. Mechanisms that ensure systematic involvement of legitimate representatives of the affected community as partners in research are the only way to ensure that future trials will proceed in a more productive way. ■

Arlene Chua (msfb-bangkok@brussels.msf.org)

Nathan Ford

David Wilson

Paul Cawthorne

Médecins Sans Frontières

Bangkok, Thailand

#### References

1. Singh J, Mills E (2005) The abandoned trials of pre-exposure prophylaxis for HIV: What went wrong? *PLoS Med* 2: e234. DOI: 10.1371/journal.pmed.0020234
2. Lange J (2005) We must not let protestors derail trials of pre-exposure prophylaxis for HIV. *PLoS Med* 2: e248. DOI: 10.1371/journal.pmed.0020248
3. [Anonymous] (2005) The trials of tenofovir trials. *Lancet* 365: 1111.
4. Human Rights Watch (2004) Thailand—Not enough graves: The war on drugs, HIV/AIDS, and violations of human rights. New York: Human Rights Watch. Available: <http://www.hrw.org/reports/2004/thailand0704/thailand0704.pdf>. Accessed 31 August 2005.
5. Shinawatra T (2004) Opening address. 15th International AIDS Conference; 2004 July 11–16 July; Bangkok, Thailand. International Aids Society, Thai Ministry of Public Health. Available: [http://www.kaisernet.org/health\\_cast/uploaded\\_files/071104\\_ias\\_opening.pdf](http://www.kaisernet.org/health_cast/uploaded_files/071104_ias_opening.pdf). Accessed 6 September 2005.
6. Jintarakanon S, Nakapiew S, Tienudom N, Suwannawong P, Wilson D (2005) Unethical clinical trials in Thailand: A community response. *Lancet* 367: 1617–1618.
7. Suwanjandee J, Wilson D (1999) Helsinki declaration and Thailand. *Lancet* 354: 343.
8. Wilson D (1999) North–South research in developing countries must respond to community's priorities. *BMJ* 319: 1496–1497.

**Citation:** Chua A, Ford N, Wilson D, Cawthorne P (2005) The tenofovir pre-exposure prophylaxis trial in Thailand: Researchers should show more openness in their engagement with the community. *PLoS Med* 2(10): e346.

**Copyright:** © 2005 Chua et al. This is an open-access article distributed under the terms of the Creative Commons Attribution License, which permits unrestricted use,

distribution, and reproduction in any medium, provided the original author and source are credited.

**Competing Interests:** The authors have declared that no competing interests exist.

**DOI:** 10.1371/journal.pmed.0020346

## Response to Joep M. A. Lange

### Melissa Ditmore

Joep M. A. Lange, in his *PLoS Medicine* Perspective [1], neglected the complaints of the sex workers in the tenofovir trials—a lack of attention to their long-term health care, an appalling lack of answers to their questions about side effects, inadequate translation of the trial materials in some places, and, in past experience, a failure to deliver any new drugs to sex workers in the developing world once a trial is complete. Cambodian sex workers were offended by the assertion of trial conductors that they should be the bodies on which tests are conducted for the benefit of the rest of the world, without guarantees of health care for side effects and infections that occur during a trial, and without even receiving answers to their questions about the trial. Most people in developed countries would have been offended if they'd been asked to do the same. The expectation that marginalized populations will accept such ungracious treatment is patently offensive.

Sex workers would like to see research continue, and would like even more to see sex workers have access to effective treatment and prevention. Trial participants in developed countries have been motivated to push for faster development of drugs by the need for treatment. Sex workers have met with the organizers and supporters of the trials—this is extremely cooperative! Some meetings have been good and others have been baldfaced tokenism, some even without language translation. Nothing says "we don't care what you have to say" louder than not translating for someone flown thousands of miles to attend a meeting for two days.

When sex workers and other marginalized people are genuine participants with input at all stages of research, they will be eager research participants. There is a good example of this in the journal *Research for Sex Work*. There is an update on the tenofovir trials, but the lead article is titled "Cambodian sex workers conduct their own research" [2]. These sex workers were invited to choose a topic and design research that would be useful for them. They did so because they had input into the research at every level. Drug researchers should take note. ■

### Melissa Ditmore

Research for Sex Work

Chiang Mai, Thailand

Network of Sex Work Projects

Hong Kong, China

E-mail: editor@researchforsexwork.org

#### References

1. Lange J (2005) We must not let protestors derail trials of pre-exposure prophylaxis for HIV. *PLoS Med* 2: e248. DOI: 10.1371/journal.pmed.0020248
2. Jenkins C (2005) Cambodian sex workers conduct their own research. *Res Sex Work* 2005: 3. Available: <http://www.researchforsexwork.org>. Accessed 31 August 2005.

**Citation:** Ditmore M (2005) Response to Joep M. A. Lange. *PLoS Med* 2(10): e347.

**Copyright:** © 2005 Melissa Ditmore. This is an open-access article distributed under the terms of the Creative Commons Attribution License, which permits unrestricted use, distribution, and reproduction in any medium, provided the original author and source are credited.

**Competing Interests:** MD was an inaugural board member of the Network of Sex Work Projects, and is Editor of Research for Sex Work, which is published by the Network of Sex Work Projects. MD has encouraged participation, and recommended specific people for meetings with the Gates Foundation and the Joint United Nations Programme on HIV/AIDS, but has not been employed by these agencies. MD has advocated for participatory approaches to research.

**DOI:** 10.1371/journal.pmed.0020347

---

## The Focus of the Media Is Medical Intervention, Not the Pursuit of Health

### Desmond A. Gale

As the title of my response to the PLoS Medicine Debate [1] implies, the media know little and care less about the pursuit of health or about the requirements for health promotion, health maintenance, health protection, and disease prevention. Equally regrettable is the fact that very few journalists have the medical or scientific knowledge to qualify them to analyse and to think and write critically about medical policies and practices. Another shortcoming of the media is that their priority is not to educate and inform but to entertain the public. The outcome of this priority is that the most the public can expect from the media are meaningless fragments of information often calculated to confuse rather than enlighten them. ■

#### References

1. Schwitzer G, Mudur G, Henry D, Wilson A, Goozner M, et al. (2005) What are the roles and responsibilities of the media in disseminating health information? PLoS Med 2: e215. DOI: 10.1371/journal.pmed.0020215

#### Desmond A. Gale

Barbados Cancer Society  
St. Michael, Barbados  
E-mail: dayrellscourt9@yahoo.com

**Citation:** Gale DA (2005) The focus of the media is medical intervention not the pursuit of health. PLoS Med 2(10): e362.

**Copyright:** © 2005 Desmond A. Gale. This is an open-access article distributed under the terms of the Creative Commons Attribution License, which permits unrestricted use, distribution, and reproduction in any medium, provided the original author and source are credited.

**Competing Interests:** DAG is Honorary Director of Tobacco Control Program, Barbados Cancer Society, St. Michael, Barbados.

**DOI:** 10.1371/journal.pmed.0020362

---

## Layperson's View

### Simone Autry

In regards to the media's dissemination of health information [1], I think there are the following three problems. Firstly, the media are shamefully sensational. Headlines can be misleading just to draw attention to them. Secondly, the media publish conflicting study reports (often going back and forth between conflicting findings more than once). Then, they find people to dispense advice based on these reports (also going back and forth multiple times) without giving good explanations as to why there are conflicting reports. Thirdly, if I were to summarize my thoughts about what I hear in the media, it would be that everything fights cancer if it doesn't kill you first. What was good for you last week will kill you this week. There is no point, then, in following advice. ■

#### Simone Autry

New York, New York, United States of America

E-mail: indiratheone@yahoo.com

#### References

1. Schwitzer G, Mudur G, Henry D, Wilson A, Goozner M, et al. (2005) What are the roles and responsibilities of the media in disseminating health information? PLoS Med 2: e215. DOI: 10.1371/journal.pmed.0020215

**Citation:** Autry S (2005) Layperson's view. PLoS Med 2(10): e363.

**Copyright:** © 2005 Simone Autry. This is an open-access article distributed under the terms of the Creative Commons Attribution License, which permits unrestricted use, distribution, and reproduction in any medium, provided the original author and source are credited.

**Competing Interests:** The author has declared that no competing interests exist.

**DOI:** 10.1371/journal.pmed.0020363

---

## We Must Find the Problem in the Intrinsic Mechanisms of Both Media and Medical Research

### Luciano Benedetti

Desmond Gale is right: the media don't care about health promotion and disease prevention [1,2]. In fact, this is not their job; the main task of the media is to inform the public correctly. To inform, especially about medicine and health, means to disseminate all relevant news, together with (and never without) all information needed to understand the facts and to use them.

I'm very concerned about the present situation of the medical media. I see three different problems. Firstly, journalists often fail to carry out this main task because they are forced by the media industry to produce spectacle or to entertain their public. Secondly, many journalists don't know enough about medicine, and many scientists are unable, or refuse, to communicate. Some scientists, in contrast, use the media as a personal launch window. Thirdly, with the increasing privatization of research funding, many clinical studies are classified (that is, the results, if negative, are kept secret by the sponsor) and often full of methodological bias. On the other hand, a lot of scientific communication is masked advertising.

These factors make it difficult to achieve good health journalism. Fortunately, many colleagues all over the world (both journalists and researchers) are trying to find solutions to these problems. ■

#### References

1. Gale DA (2005) The focus of the media is medical intervention not the pursuit of health. PLoS Med 2: e362. DOI: 10.1371/journal.pmed.0020362
2. Schwitzer G, Mudur G, Henry D, Wilson A, Goozner M, et al. (2005) What are the roles and responsibilities of the media in disseminating health information? PLoS Med 2: e215. DOI: 10.1371/journal.pmed.0020215

#### Luciano Benedetti

Saatchi and Saatchi Health Care  
Milano, Italy  
E-mail: luciano.benedetti@fastwebnet.it

**Citation:** Benedetti L (2005) We must find the problem in the intrinsic mechanisms of both media and medical research. PLoS Med 2(10): e364.

**Copyright:** © 2005 Luciano Benedetti. This is an open-access article distributed under the terms of the Creative Commons Attribution License, which permits unrestricted use, distribution, and reproduction in any medium, provided the original author and source are credited.

**Competing Interests:** LB is a scientific journalist.

**DOI:** 10.1371/journal.pmed.0020364
